# Supplementary material for: Discovering a new MgH2 metastable phase
Source: Royal Society of Chemistry journal article supplement (doi:10.1039/c8ra07068g), 2018-01-01
Supplement: c8ra07068g1.pdf [file c8ra07068g1.pdf]

## Discovering a New MgH<sub>2</sub> Metastable Phase

Mohamed Sherif El-Eskandarany,\* Mohammad Banyan, Fahad Al-Ajmi

*Nanotechnology and Advanced Materials Program, Energy and Building  
Research Center, Kuwait Institute for Scientific Research, Safat 13109, Kuwait.*

\* Correspondence author, [msherif@kisir.edu.kw](mailto:msherif@kisir.edu.kw)

## Electronic Supplementary Information

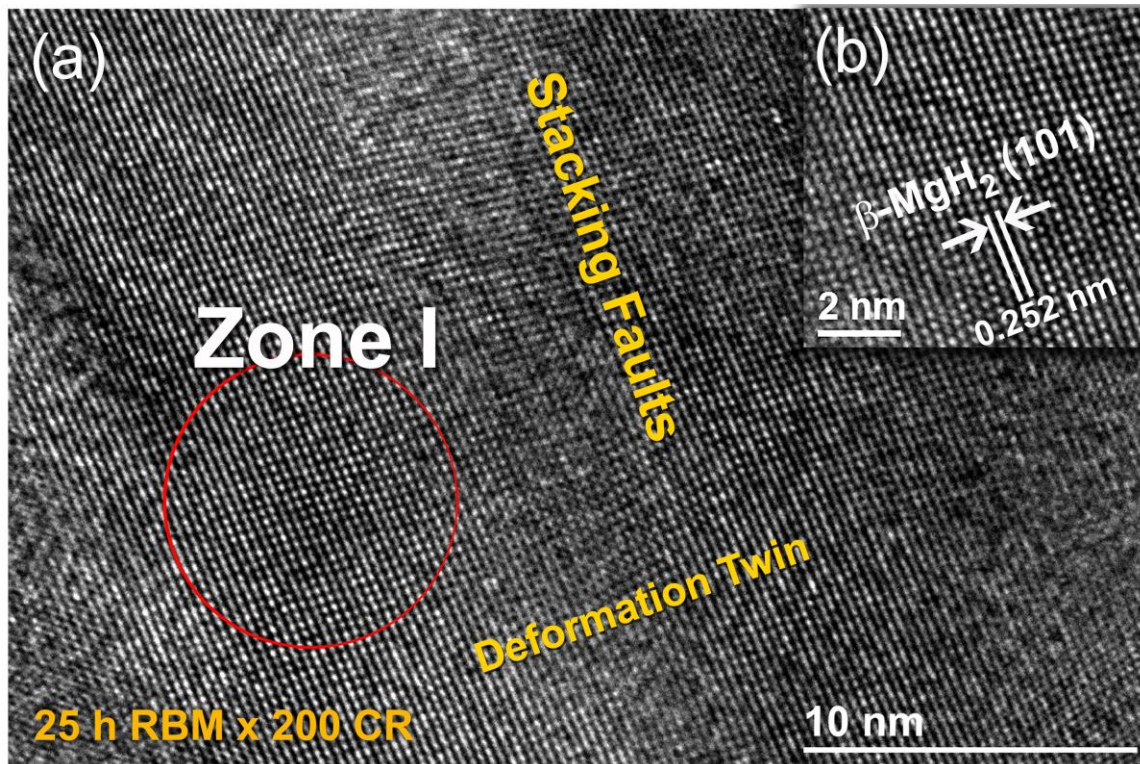

Fig. S1

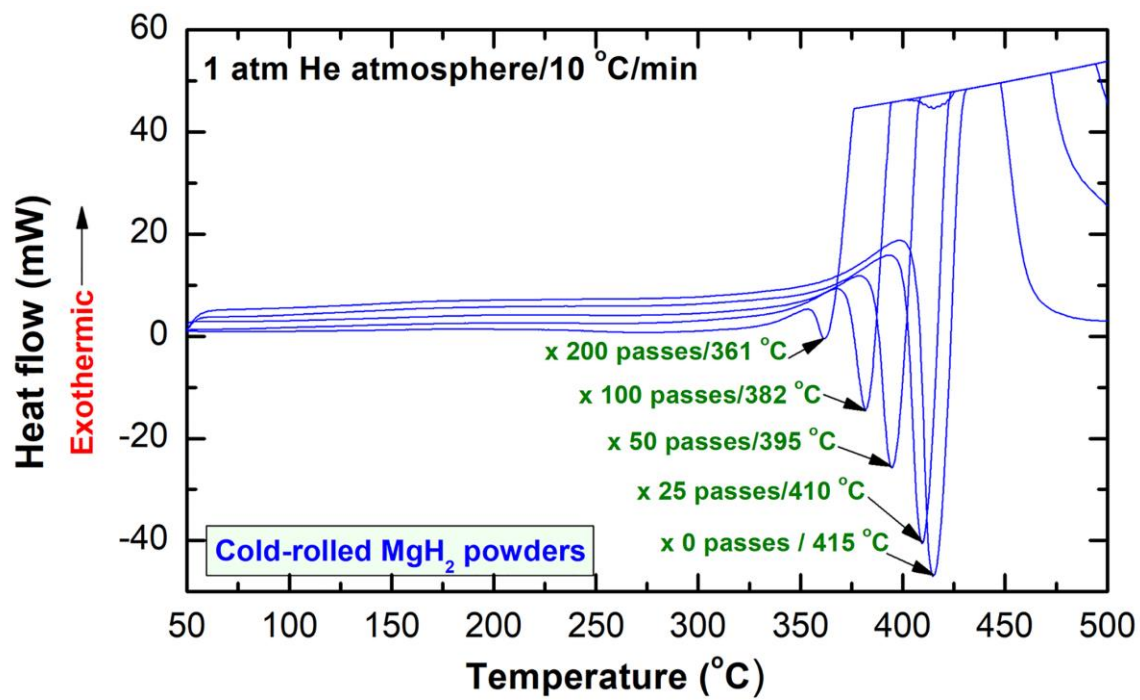

Fig. S2

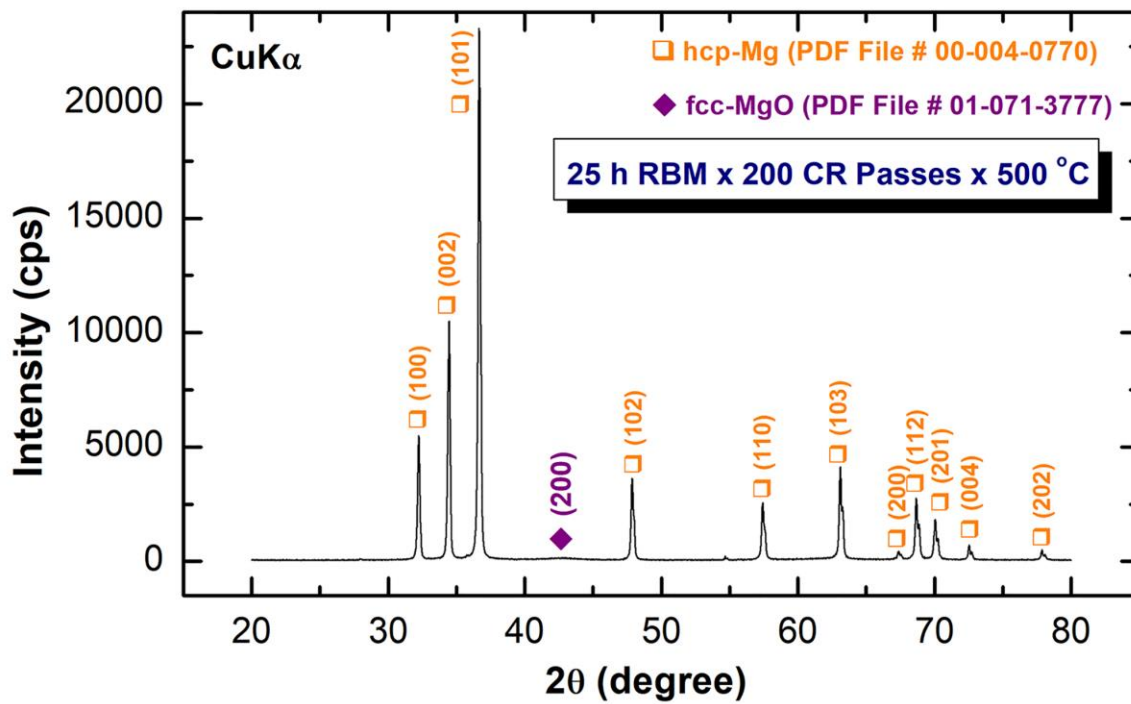

Fig. S3
